# Supplementary material for: Design, synthesis and evaluation of 2-aryl benzoxazoles as promising hit for the A2A receptor
Source: PubMed Central journal article supplement — J Enzyme Inhib Med Chem. 2017 Jun 29;32(1):850–64. doi: 10.1080/14756366.2017.1334648 (PMC6445171; doi:10.1080/14756366.2017.1334648), 2017-06-29
Supplement: IENZ_A_1334648_SM1062.pdf [file IENZ_A_1334648_SM1062.pdf]

# Design, synthesis and evaluation of 2-aryl benzoxazoles as promising hit for the A<sub>2A</sub> receptor

Romain Duroux<sup>a</sup>, Nicolas Renault<sup>b</sup>, Joana Esteves Cuelho<sup>c</sup>, Laurence Agouridas<sup>a</sup>, David Blum<sup>a</sup>, Luisa Lopes<sup>c</sup>, Patricia Melnyk<sup>a</sup> and Saïd Yous<sup>a\*</sup>

<sup>a</sup>Univ. Lille, Inserm, CHU Lille, UMR-S 1172 - JPArc - Centre de Recherche Jean-Pierre AUBERT Neurosciences et Cancer, F-59000 Lille, France; <sup>b</sup>Univ. Lille, Inserm, CHU Lille, U995 - LIRIC - Lille Inflammation Research International Center, F-59000 Lille, France; <sup>c</sup>Instituto de Medicina Molecular, 1640-028, Lisbon, Portugal

\*Corresponding author. “Onco and NeuroChemistry”, Jean-Pierre Aubert Research Center, UMR-S1172, Faculté de Pharmacie (Université Lille), 3, rue du Pr Laguesse, BP 83, 59006 Lille Cedex, France. E-mail: [said.yous@univ-lille2.fr](mailto:said.yous@univ-lille2.fr)

## Supplementary material

Table 4: Preliminary selectivity studies of F1

| Cpd. | A <sub>2A</sub> (μM) <sup>a</sup> | A <sub>1</sub> (μM) <sup>b</sup> | %I (A <sub>2B</sub> ) (10 μM) <sup>c</sup> | %I (A <sub>3</sub> ) (10 μM) <sup>d</sup> |
|------|-----------------------------------|----------------------------------|--------------------------------------------|-------------------------------------------|
| F1   | 1.0±0.08                          | 2.5                              | 73                                         | 11                                        |

<sup>a</sup> Displacement of specific [<sup>3</sup>H]-ZM 241385 (2 nM) binding to hA<sub>2A</sub> receptors stably expressed in HEK293 cells. <sup>b</sup> Displacement of specific [<sup>3</sup>H]-DPCPX (1 nM) binding to hA<sub>1</sub> receptors stably expressed in CHO cells. <sup>c</sup> Displacement percentage of [<sup>3</sup>H]-CPX (5 nM) binding to hA<sub>2B</sub> receptors stably expressed in HEK293 cells at 10 μM. <sup>d</sup> Displacement percentage of [<sup>125</sup>I]-AB-MECA (0.15 nM) binding to hA<sub>3</sub> receptors stably expressed in HEK293 cells at 10 μM.
